# Supplementary material for: Synthesis of iodobiaryls and dibenzofurans by direct coupling at BDD anodes
Source: Royal Society of Chemistry journal article supplement (doi:10.1039/c4fd00049h), 2014-04-08
Supplement: c4fd00049h1.pdf [file c4fd00049h1.pdf]

## Gas chromatogram after electrolysis of **8** at BDD.

Electrolysis conditions: 50 °C, constant current ( $j = 4.7 \text{ mA/cm}^2$ ), BDD anode and cathode, undivided cell,  $Q = 1 \text{ F}$  (phenol **8**), supporting electrolyte: 0.09 M  $\text{Bu}_3\text{NMe O}_3\text{SOMe}$ . Internal standard: octacosan.

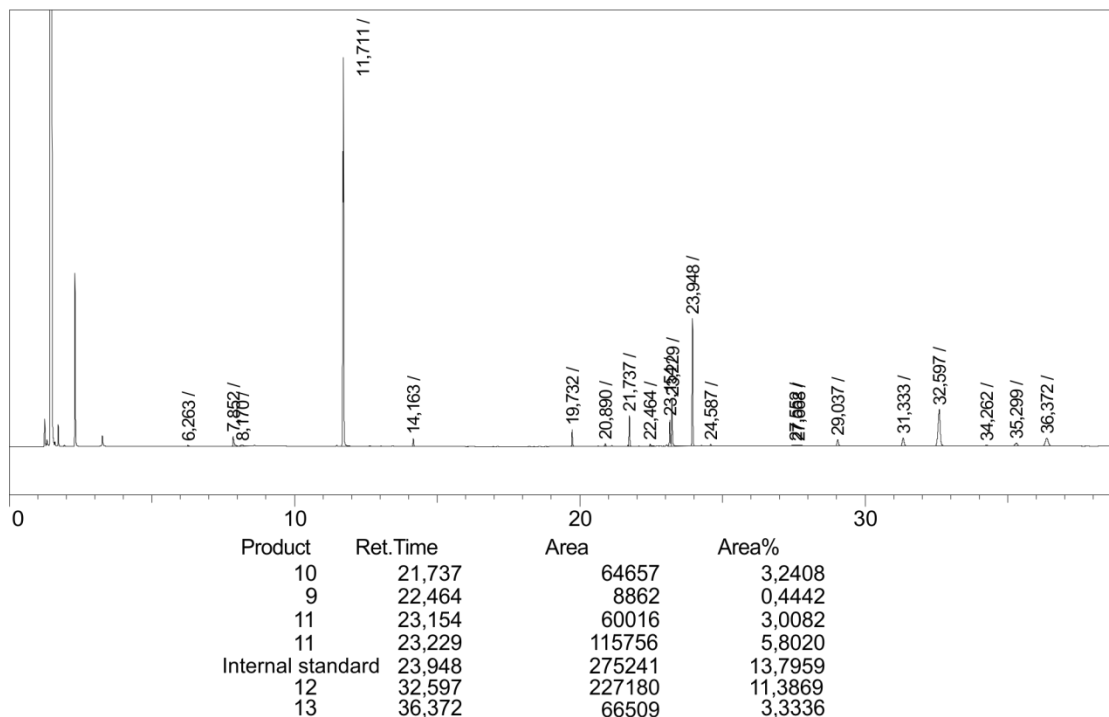

## Gas chromatogram after electrolysis of **8** at glassy carbon.

Electrolysis conditions: 50 °C, constant current ( $j = 4.7 \text{ mA/cm}^2$ ), BDD anode and cathode, undivided cell,  $Q = 1 \text{ F}$  (phenol **8**), supporting electrolyte: 0.09 M  $\text{Bu}_3\text{NMe O}_3\text{SOMe}$ . Internal standard: octacosan.

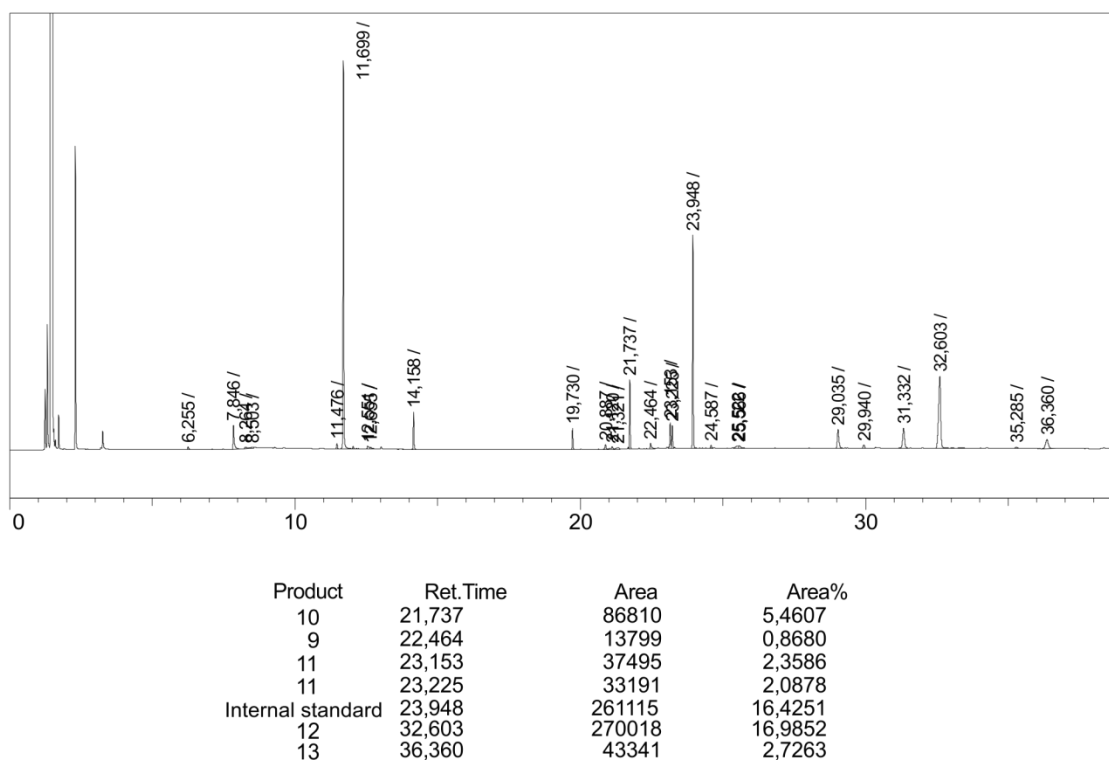

| Entry | Product   | Product : Intern. Std<br><b>glassy carbon</b> | Product : Intern. Std<br><b>BDD</b> |
|-------|-----------|-----------------------------------------------|-------------------------------------|
| 1     | <b>9</b>  | 0.053                                         | 0.032                               |
| 2     | <b>10</b> | 0.271                                         | 0.639                               |
| 3     | <b>11</b> | 0.332                                         | 0.235                               |
| 4     | <b>12</b> | 1.034                                         | 0.802                               |
| 5     | <b>13</b> | 0.166                                         | 0.242                               |
